# Supplementary material for: Evaluation of Porous Honeycomb-Shaped CuO/CeO2 Catalyst in Vapour Phase Glycerol Reforming for Sustainable Hydrogen Production
Source: MDPI journal article supplement (doi:10.3390/catal12090941), 2022-08-24
Supplement: s1 [file s1]

Supplementary documents

# Evaluation of Porous Honeycomb-Shaped CuO/CeO<sub>2</sub> Catalyst in Vapour Phase Glycerol Reforming for Sustainable Hydrogen Production

Adrian Chun Minh Loy \*, Shanthi Priya Samudrala and Sankar Bhattacharya \*

Department of Chemical and Biological Engineering, Faculty of Engineering, Monash University, Wellington Road, Clayton, VIC 3800, Australia; ssipriya30486@gmail.com

\* Correspondence: adrian.loy@monash.edu (A.C.M.L.); sankar.bhattacharya@monash.edu (S.B.)

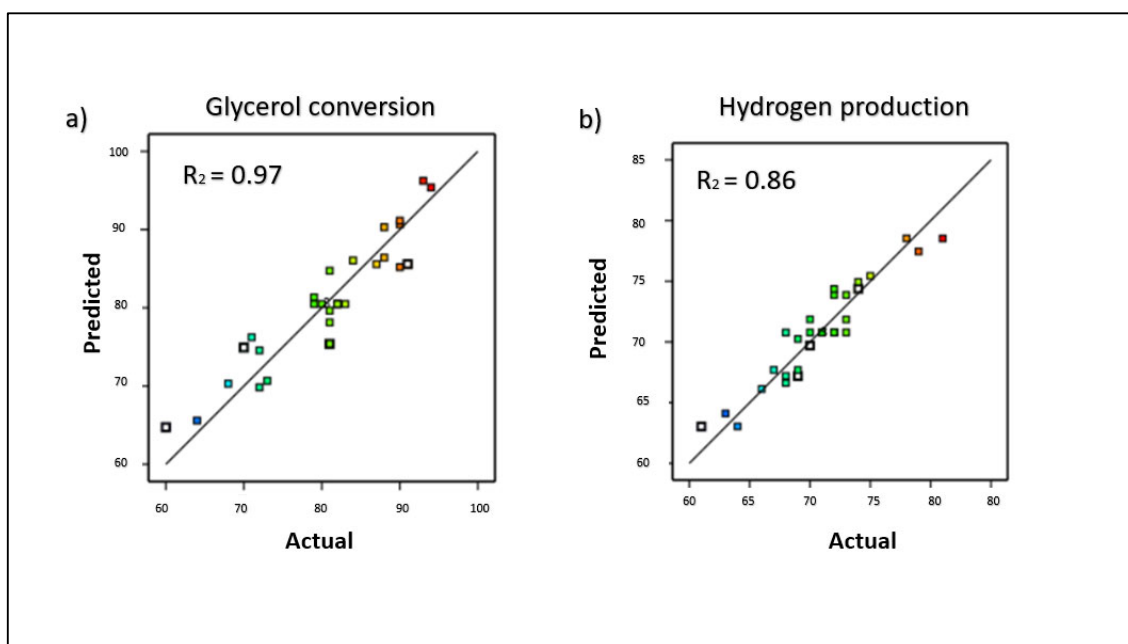

**Figure S1.** Predicted vs actual data: **a)** glycerol conversion and **b)** hydrogen production.

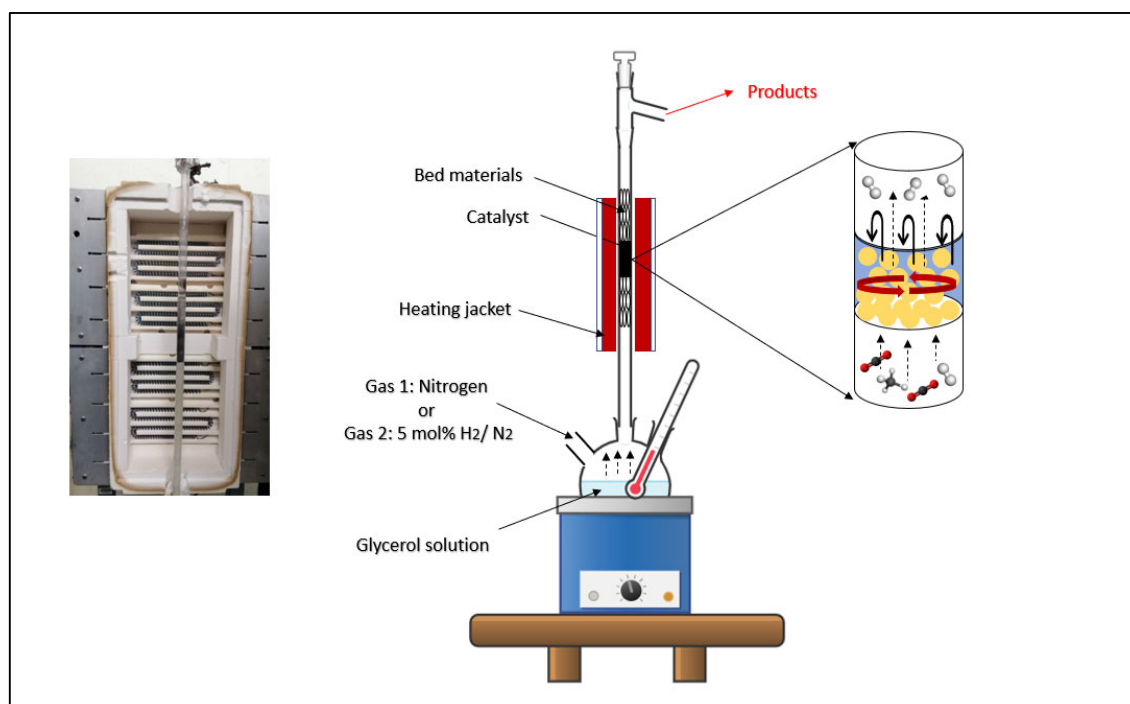

Figure S2. Schematic diagram of the VPCGR experimental set-up.

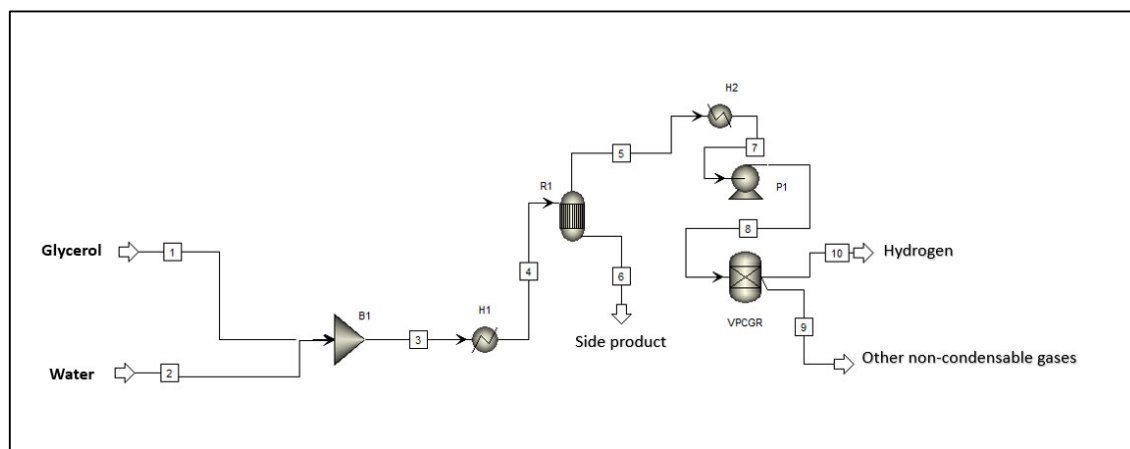

Figure S3. Aspen Plus Flow diagram for VPCGR.
